# Supplementary material
Source: HighWire-hosted journal article supplement (https://bmjopen.bmj.com/content/8/1/e019833)
Supplement: inline-supplementary-material-2 [file inline-supplementary-material-2.pdf]

## PubMed – Search Strategy – November 23 2017

| Search             | Add to builder      | Query                                                                                                                                                                                                                                                                                                                                                                                                                                                                                                                                                                                                                                                                                                                                                                                                                                                                                                                                                                                                                                                                                                                                                                                                                                                                                                                                                                                                                                                   | Items found             | Time     |
|--------------------|---------------------|---------------------------------------------------------------------------------------------------------------------------------------------------------------------------------------------------------------------------------------------------------------------------------------------------------------------------------------------------------------------------------------------------------------------------------------------------------------------------------------------------------------------------------------------------------------------------------------------------------------------------------------------------------------------------------------------------------------------------------------------------------------------------------------------------------------------------------------------------------------------------------------------------------------------------------------------------------------------------------------------------------------------------------------------------------------------------------------------------------------------------------------------------------------------------------------------------------------------------------------------------------------------------------------------------------------------------------------------------------------------------------------------------------------------------------------------------------|-------------------------|----------|
| <a href="#">#8</a> | <a href="#">Add</a> | Search (((((((((Researcher*[Title/Abstract]) OR Scientist*[Title/Abstract]) OR Expert*[Title/Abstract]) OR Investigator*[Title/Abstract]) OR Academic*[Title/Abstract])) AND (((public[Title/Abstract]) OR non-experts[Title/Abstract]) OR population[Title/Abstract])) AND (((health[Title/Abstract]) OR biomedical[Title/Abstract]) OR medical[Title/Abstract])) AND (((science[Title/Abstract]) OR research[Title/Abstract]) OR scholarly[Title/Abstract]) OR findings[Title/Abstract]) OR results[Title/Abstract]) OR innovation[Title/Abstract]) OR evidence[Title/Abstract])) AND (((communicati*[Title/Abstract]) OR disseminati*[Title/Abstract]) OR popularizati*[Title/Abstract]) OR vulgariz*[Title/Abstract]) OR diffusion[Title/Abstract]) OR outreach[Title/Abstract])) AND (((((((((((((((disintermediation[Title/Abstract]) OR online[Title/Abstract]) OR interactive[Title/Abstract]) OR blog[Title/Abstract]) OR web*[Title/Abstract]) OR internet[Title/Abstract]) OR social media[Title/Abstract]) OR youtube[Title/Abstract]) OR twitter[Title/Abstract]) OR facebook[Title/Abstract]) OR reddit[Title/Abstract]) OR instagram[Title/Abstract]) OR vimeo[Title/Abstract]) OR digital[Title/Abstract]) OR podcast*[Title/Abstract]) OR iTunes U[Title/Abstract]) OR forum[Title/Abstract]) OR discussion board[Title/Abstract]) OR content-sharing[Title/Abstract]) OR video-sharing[Title/Abstract]) OR linkedin[Title/Abstract])) | <a href="#">664</a>     | 02:19:20 |
| <a href="#">#7</a> | <a href="#">Add</a> | Search (((((((((((((((disintermediation[Title/Abstract]) OR online[Title/Abstract]) OR interactive[Title/Abstract]) OR blog[Title/Abstract]) OR web*[Title/Abstract]) OR internet[Title/Abstract]) OR social media[Title/Abstract]) OR youtube[Title/Abstract]) OR twitter[Title/Abstract]) OR facebook[Title/Abstract]) OR reddit[Title/Abstract]) OR instagram[Title/Abstract]) OR vimeo[Title/Abstract]) OR digital[Title/Abstract]) OR podcast*[Title/Abstract]) OR iTunes U[Title/Abstract]) OR forum[Title/Abstract]) OR discussion board[Title/Abstract]) OR content-sharing[Title/Abstract]) OR video-sharing[Title/Abstract]) OR linkedin[Title/Abstract]                                                                                                                                                                                                                                                                                                                                                                                                                                                                                                                                                                                                                                                                                                                                                                                      | <a href="#">349659</a>  | 02:18:41 |
| <a href="#">#6</a> | <a href="#">Add</a> | Search (((((((communicati*[Title/Abstract]) OR disseminati*[Title/Abstract]) OR popularizati*[Title/Abstract]) OR vulgariz*[Title/Abstract]) OR diffusion[Title/Abstract]) OR outreach[Title/Abstract]                                                                                                                                                                                                                                                                                                                                                                                                                                                                                                                                                                                                                                                                                                                                                                                                                                                                                                                                                                                                                                                                                                                                                                                                                                                  | <a href="#">447228</a>  | 02:12:53 |
| <a href="#">#5</a> | <a href="#">Add</a> | Search (((((((science[Title/Abstract]) OR research[Title/Abstract]) OR scholarly[Title/Abstract]) OR findings[Title/Abstract]) OR results[Title/Abstract]) OR innovation[Title/Abstract]) OR evidence[Title/Abstract]                                                                                                                                                                                                                                                                                                                                                                                                                                                                                                                                                                                                                                                                                                                                                                                                                                                                                                                                                                                                                                                                                                                                                                                                                                   | <a href="#">9537587</a> | 02:10:41 |
| <a href="#">#4</a> | <a href="#">Add</a> | Search (((health[Title/Abstract]) OR biomedical[Title/Abstract]) OR medical[Title/Abstract]                                                                                                                                                                                                                                                                                                                                                                                                                                                                                                                                                                                                                                                                                                                                                                                                                                                                                                                                                                                                                                                                                                                                                                                                                                                                                                                                                             | <a href="#">2369208</a> | 02:09:34 |
| <a href="#">#3</a> | <a href="#">Add</a> | Search (((public[Title/Abstract]) OR non-experts[Title/Abstract]) OR population[Title/Abstract]                                                                                                                                                                                                                                                                                                                                                                                                                                                                                                                                                                                                                                                                                                                                                                                                                                                                                                                                                                                                                                                                                                                                                                                                                                                                                                                                                         | <a href="#">1489568</a> | 02:09:10 |
| <a href="#">#2</a> | <a href="#">Add</a> | Search (((Researcher*[Title/Abstract]) OR Scientist*[Title/Abstract]) OR Expert*[Title/Abstract]) OR Investigator*[Title/Abstract]) OR Academic*[Title/Abstract]                                                                                                                                                                                                                                                                                                                                                                                                                                                                                                                                                                                                                                                                                                                                                                                                                                                                                                                                                                                                                                                                                                                                                                                                                                                                                        | <a href="#">474697</a>  | 02:08:31 |
